# Multiparametric Platform for Profiling Lipid Trafficking in Human Leukocytes: Application for Hypercholesterolemia

3

## 4 Authors and Affiliations:

5 Simon G. Pfisterer<sup>1\*</sup>, PhD, Ivonne Brock<sup>1,2,3</sup>, PhD, Kristiina Kanerva<sup>1,2,3</sup>, PhD, Iryna  
6 Hlushchenko<sup>1</sup>, PhD, Lassi Paavolainen<sup>4</sup>, PhD, Pietari Ripatti<sup>4</sup>, MD, Mohammad M. Islam<sup>1</sup>, Aija  
7 Kyttälä<sup>5</sup>, PhD, Maria D. Di Taranto<sup>6,7</sup>, PhD, Annalisa Scotto di Frega<sup>7</sup>, Giuliana Fortunato<sup>6,7</sup>, MD,  
8 Johanna Kuusisto<sup>8</sup>, MD, Peter Horvath<sup>4,9</sup>, PhD, Samuli Ripatti<sup>4,10,11</sup>, PhD, Markku Laakso<sup>8</sup>, MD  
9 PhD, Elina Ikonen<sup>1,2,3\*</sup>, MD PhD

10 **1)** Department of Anatomy, Faculty of Medicine, University of Helsinki, Helsinki, Finland; **2)**  
11 Stem Cells and Metabolism Research Program, Faculty of Medicine, University of Helsinki,  
12 Helsinki, Finland; **3)** Minerva Foundation Institute for Medical Research, Helsinki, Finland; **4)**  
13 Institute for Molecular Medicine Finland (FIMM), HiLIFE, University of Helsinki, Helsinki, Finland;  
14 **5)** Finnish Institute for Health and Welfare (THL), THL Biobank, Helsinki, Finland; **6)** Department  
15 of Molecular Medicine and Medical Biotechnologies, University of Naples Federico II, Italy; **7)**  
16 CEINGE Biotecnologie Avanzate scarl Naples, Italy; **8)** Department of Medicine, University of  
17 Eastern Finland and Kuopio University Hospital, Kuopio, Finland; **9)** Biological Research Center,  
18 Szeged, Hungary; **10)** Department of Public Health, Clinicum, Faculty of Medicine, University of  
19 Helsinki, Helsinki, Finland; **11)** The Broad Institute of MIT and Harvard, Cambridge, MA, USA  
20 \*corresponding authors.

21 **Contact info:** Dr. Simon Pfisterer and Dr. Elina Ikonen, Haartmaninkatu 8, 00290 Helsinki,  
22 Finland, email: [simon.pfisterer@helsinki.fi](mailto:simon.pfisterer@helsinki.fi) and [elina.ikonen@helsinki.fi](mailto:elina.ikonen@helsinki.fi)

23

24

25

26

27

28

29

30

31

32

33

34

35

1

1

2 **Summary:**

3 Systematic insight into cellular dysfunctions can improve understanding of disease etiology, risk  
4 assessment and patient stratification. We present a multiparametric high-content imaging  
5 platform enabling quantification of low-density lipoprotein (LDL) uptake and lipid storage in  
6 cytoplasmic droplets of primary leukocyte subpopulations. We validated this platform with  
7 samples from 65 individuals with variable blood LDL-cholesterol (LDL-c) levels, including familial  
8 hypercholesterolemia (FH) and non-FH subjects. We integrated lipid storage data into a novel  
9 readout, lipid mobilization, measuring the efficiency with which cells deplete lipid reservoirs.  
10 Lipid mobilization correlated positively with LDL uptake and negatively with  
11 hypercholesterolemia and age, improving differentiation of individuals with normal and elevated  
12 LDL-c. Moreover, combination of cell-based readouts with a polygenic risk score for LDL-c  
13 explained hypercholesterolemia better than the genetic risk score alone. This platform provides  
14 functional insights into cellular lipid trafficking from a few ml's of blood and is applicable to  
15 dissect metabolic disorders, such as hypercholesterolemia.

16

17 **Keywords:**

18 High-content imaging, automated image analysis, low-density lipoprotein (LDL), LDL receptor  
19 (LDLR), lipid droplet, hypercholesterolemia, familial hypercholesterolemia (FH), obesity

20

21 **Motivation:**

22 We have limited information on how cellular lipid uptake and processing differ between  
23 individuals and influence the development of metabolic diseases, such as hypercholesterolemia.  
24 Available assays are labor intensive, require skilled personnel and are difficult to scale to higher  
25 throughput, making it challenging to obtain systematic functional cell-based data from  
26 individuals. To overcome this problem, we established a scalable automated analysis pipeline  
27 enabling reliable quantification of multiple cellular readouts, including lipid uptake, storage and  
28 mobilization, from different white blood cell populations. This approach provides new  
29 personalized insights into the cellular basis of hypercholesterolemia and obesity.

30

31

32

33

34

35

1 **Graphical Abstract:**

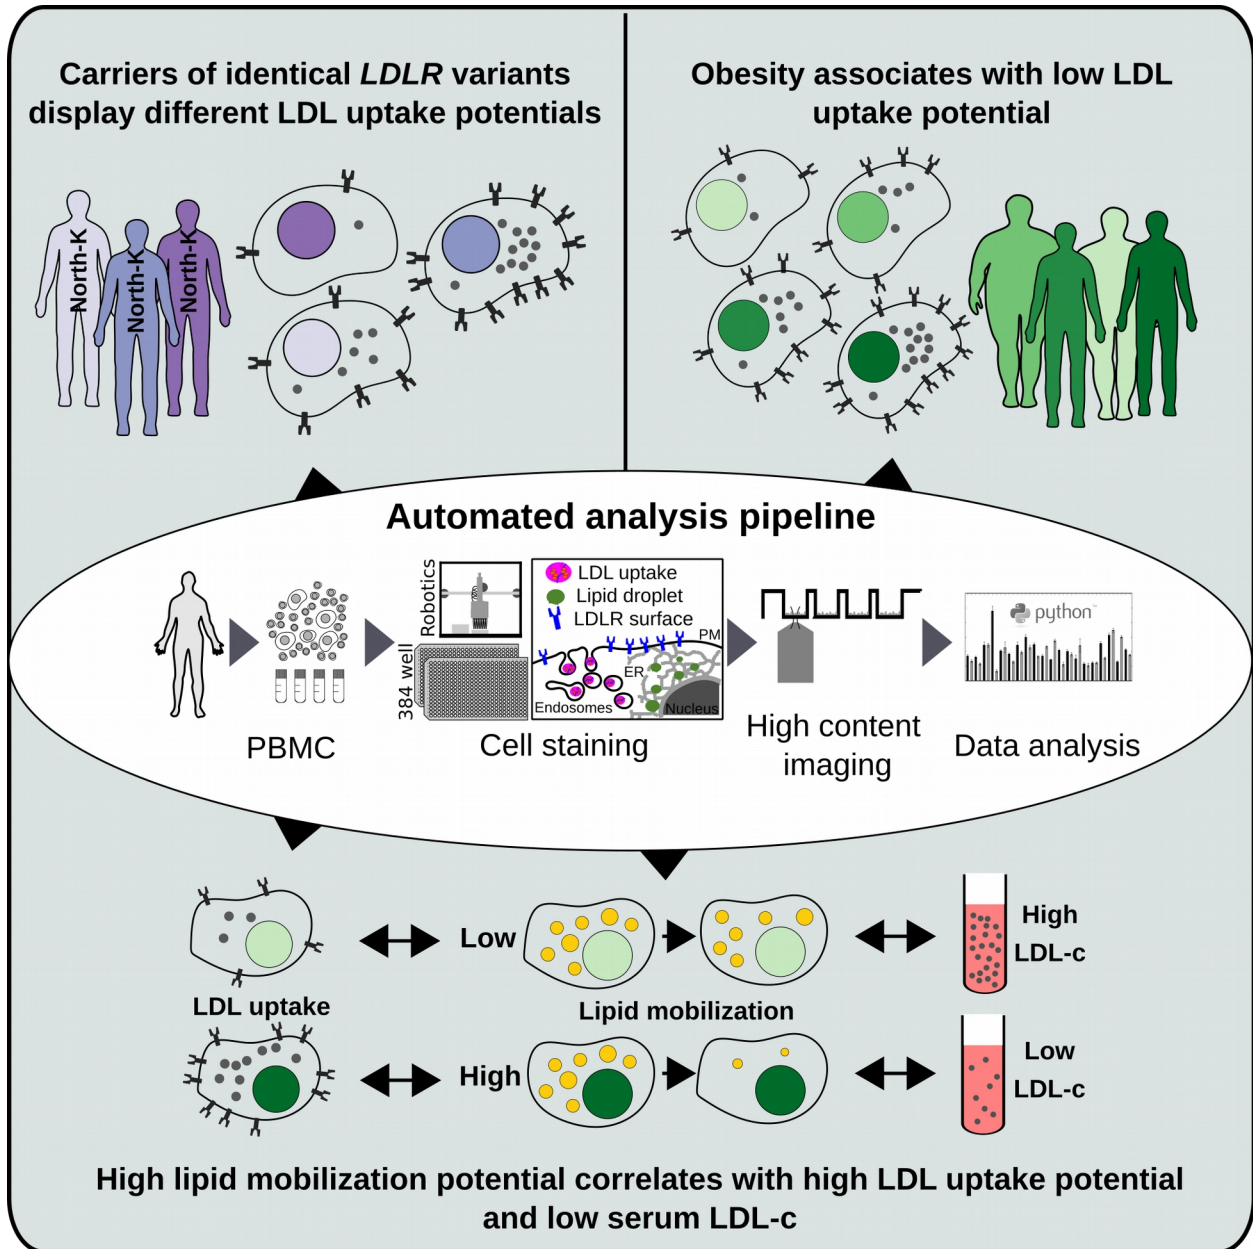

3

4

1

3

## 1 **Introduction:**

2 Hypercholesterolemia is one of the most common metabolic disorders and a major risk factor for  
3 cardiovascular disease (CVD). It is characterized by an accumulation of low-density lipoprotein  
4 cholesterol (LDL-c) in the blood<sup>1</sup>. In familial hypercholesterolemia (FH), mutations, most  
5 commonly in the LDL receptor (*LDLR*) gene, lead to increased LDL-c. However, FH represents  
6 only 2.5% of all hypercholesterolemia patients. For the remainder, polygenic and lifestyle effects  
7 appear as the main contributing factors<sup>2-5</sup>.

8 So far, we have little information on how cellular lipid trafficking and storage are altered in  
9 individual patients. However, systematic assessment of LDL uptake and other mechanisms  
10 related to hypercholesterolemia could provide insights into disease mechanisms and treatment  
11 outcomes in a personalized manner. The majority of high-risk hypercholesterolemia patients  
12 does not achieve their LDL-c target levels<sup>6</sup>. This could be due to sub-optimal treatment, non-  
13 adherence to therapy and/or cellular programs limiting drug efficacy. Increased evidence from  
14 cancer therapy demonstrates that cell-based assays can provide better targeted and more  
15 effective personalized treatment strategies<sup>7</sup>. Regarding hypercholesterolemia, we need to  
16 establish scalable and reliable assays that allow systematic profiling of functional defects in  
17 individual persons and evaluate how to utilize such assays to better explain factors contributing  
18 to hypercholesterolemia in individual patients.

19 The currently used cell-based assays for studying the etiology of hypercholesterolemia are  
20 quantification of cellular LDL uptake or LDLR cell surface expression using flow cytometry.  
21 These readouts have been mostly utilized to characterize the severity of *LDLR* mutations in FH  
22 patients<sup>8,9</sup>. However, LDLR surface expression and LDL uptake are highly variable among FH  
23 patients<sup>10-12</sup>. This not only speaks for the importance of functional cell-based assays but also  
24 calls for new cellular readouts to better characterize the heterogeneity of lipid metabolism in  
25 individual subjects.

26 LDLR expression and cellular LDL internalization are tightly regulated. Low cholesterol levels in  
27 the endoplasmic reticulum (ER) signal cholesterol starvation and trigger increased LDLR  
28 expression, while high cholesterol in the ER downregulates LDLR expression. Excess ER  
29 cholesterol is stored as cholesterol ester in lipid droplets (LD), from where it can be mobilized  
30 upon need<sup>13,14</sup>. We therefore considered that quantification of cellular LDs and their dynamic  
31 changes upon altering lipoprotein availability may provide additional information for assessing  
32 the cellular basis of hypercholesterolemia.

33 Here, we established sensitive and scalable analyses for automated quantification of fluorescent  
34 lipid uptake, storage and removal in primary lymphocyte and monocyte populations, and defined  
35 lipid mobilization as a novel parameter measuring how efficiently cells deplete their lipid stores.  
36 We found marked differences in the parameters established in both FH and non-FH study  
37 groups and highlight their potential to provide deeper insights into the cellular mechanisms of  
38 hypercholesterolemia.

39

## 1 **Results:**

### 2 ***Automated pipeline for quantification of hypercholesterolemia-related functional defects*** 3 ***in primary human leukocytes***

4 Several cell types such as lymphocytes, monocytes and Epstein-Barr virus (EBV) immortalized  
5 lymphoblasts have been used for measuring LDL uptake<sup>15,16</sup>. Whilst EBV lymphoblasts show the  
6 highest LDL uptake, cell immortalization is time consuming and alters cellular functions<sup>15,17</sup>. We  
7 therefore set up an automated imaging and analysis pipeline for sensitive quantification of LDL  
8 uptake and LDLR surface expression from less than two million peripheral blood mononuclear  
9 cells (PBMCs) (**Figure 1A**). Cryopreserved PBMCs were recovered in 96-well plates at defined  
10 densities and incubated with lipid-rich control medium (CM, 10% FBS) or lipid poor medium (LP,  
11 5% lipoprotein-deficient serum) for 24 h. Cells were labeled with fluorescent LDL particles (Dil-  
12 LDL) for 1 h, washed and automatically transferred to 384-well plates for staining and  
13 automated high-content imaging (**Figure 1A**). After adhesion to coated imaging plates,  
14 lymphocytes remain small while monocytes spread out, enabling a crude classification of  
15 leukocyte populations based on size: PBMCs with a cytoplasmic area  $<115 \mu\text{m}^2$  were classified  
16 as a lymphocyte-enriched fraction (from here on lymphocytes) and those with a cytoplasmic  
17 area  $>115 \mu\text{m}^2$  as monocyte-enriched fraction (from here on monocytes) (**Suppl. Figure 1A-C**).

18 In CM, Dil-LDL uptake into lymphocytes and monocytes was more than two-fold above the  
19 background of non-labeled cells (**Figure 1B-D**). Lipid starvation further increased Dil-LDL  
20 uptake in both cell populations, as expected (**Figure 1C, D**). We quantified about 700  
21 monocytes and 2300 lymphocytes per well (**Suppl. Figure 1D**), aggregated the single-cell data  
22 from individual wells and averaged the results from 2-4 wells for each treatment (**Suppl. Figure**  
23 **1D**). For both cell populations, we defined two readouts, cellular Dil-LDL intensity (Dil-Int),  
24 reflecting Dil-LDL surface binding and internalization, and Dil-LDL organelle number (Dil-No),  
25 reflecting internalized Dil-LDL (**Figure 1E, F**). This resulted in four parameters: Monocyte (Mo)  
26 Dil-Int, lymphocyte (Ly) Dil-Int, Mo Dil-No and Ly Dil-No. In both cell populations, Dil-Int was  
27 inhibited by adding surplus unlabeled LDL, arguing for a saturable, receptor-mediated uptake  
28 mechanism (**Suppl. Figure 1E**).

29 In lipid rich conditions, Mo Dil-Int was slightly higher than Ly Dil-Int (**Figure 1E**), and upon lipid  
30 starvation, Mo Dil-Int increased more substantially, providing a larger fold increase than Ly Dil-  
31 Int (**Figure 1E**). Furthermore, Mo Dil-No was roughly ten-fold higher than Ly Dil-No, with both  
32 parameters showing a five-fold increase upon lipid starvation (**Figure 1F**). Thus, Dil-LDL uptake  
33 into monocytes was better than into lymphocytes, but both cell populations responded to lipid  
34 starvation. As EBV lymphoblasts are often a preferred choice for LDL uptake studies<sup>20</sup> we  
35 compared LDL uptake between EBV lymphoblasts and monocytes (**Suppl. Figure 1F,G**). This  
36 showed that Dil-Int signal after lipid starvation was roughly similar in EBV-lymphoblasts and  
37 monocytes, implying that the primary cells provide high enough Dil-LDL signal intensities  
38 without cell immortalization (**Suppl. Figure 1G**).

39 To enable data comparison between experiments, we included two controls. Each control  
40 consisted of a mixture of large-scale PBMC isolations from four healthy blood donors, with the  
41 cells cryopreserved at a defined density for one-time use aliquots. In each experiment, Mo Dil-  
42 Int, Ly Dil-Int, Mo Dil-No and Ly Dil-No were normalized to these controls. We also introduced a  
43 combinatorial score, pan-LDL uptake (or pan-uptake), representing the average of Mo Dil-Int, Ly  
44 Dil-Int, Mo Dil-No and Ly Dil-No. We then assessed the intraindividual variability of these five  
45 readouts in three individuals on two consecutive days (**Suppl. Figure 1H**). The intraindividual

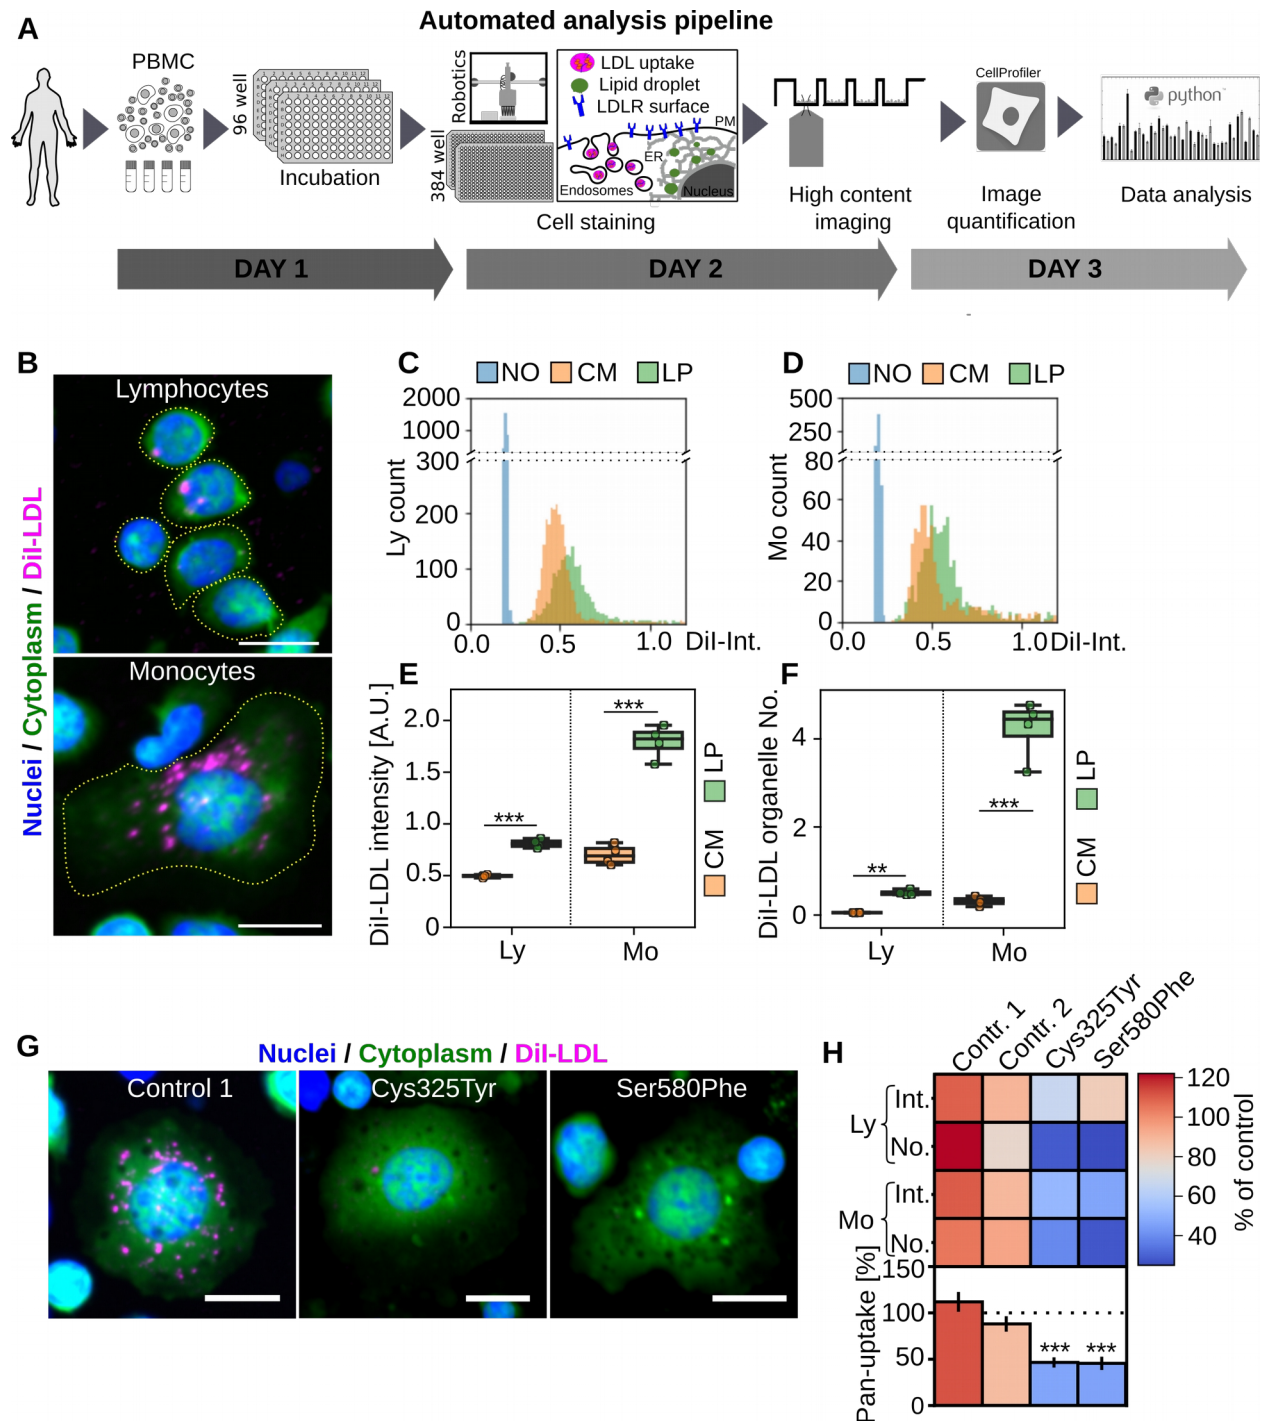

1 **Figure 1: Automated analysis pipeline for multiplex quantification of functional phenotypes in**  
2 **PBMCs. A)** Schematic presentation of the automated analysis pipeline. For each experiment  
3 cryopreserved PBMC samples were thawed, aliquoted into 96 wells and incubated overnight with lipid  
4 rich (CM, 10% FBS) or lipid poor (LP, 5% LPDS) medium. Cells were labeled with fluorescent LDL  
5 (DiI-LDL) or directly transferred to 384 well imaging plates, automatically fixed, stained and subjected  
6 to automated high-content imaging. Images were quantified with CellProfiler and single-cell data was  
7 processed with Python tools. **B)** Representative images of lymphocyte and monocyte DiI-LDL uptake

1 after lipid starvation. **C**) Histogram for cellular DiI-LDL intensities in lymphocytes and monocytes (**D**)  
2 from a single well. **E**) Quantification of mean DiI-LDL intensities and DiI-LDL organelles (**F**) in  
3 lymphocytes (Ly) and monocytes (Mo); representative of eight independent experiments, each with four  
4 wells per treatment; Student's *t*-test. **G**) Representative images of DiI-LDL uptake in monocytes isolated  
5 from FH patients with *LDLR* mutations Cys325Tyr or Ser580Phe and a control after lipid starvation. **H**)  
6 Quantification of monocyte (Mo) and lymphocyte (Ly) cellular DiI-LDL intensities (Int), DiI-LDL  
7 organelle numbers (No) and pan-uptake; duplicate wells / patient (eight wells / patient for pan-uptake).  
8 Significant changes to control 2 were calculated with Welch's *t*-test. \*\*\**p* < 0.001, \*\**p* < 0.01, scale bar  
9 = 10 μm, error bars = SEM.

10 variability was low for a cell-based assay, especially in monocytes, with 7.6% for Mo Dil-No,  
11 12% for Mo Dil-Int and 13% for pan-uptake. The values were only moderately higher in  
12 lymphocytes, with Dil-Int 15% and Dil-No 21% variability (**Suppl. Figure 1I**).

13 We next validated our LDL uptake measurements in PBMCs of two He-FH patients with highly  
14 elevated LDL-c and reduced LDL uptake in EBV lymphoblasts (Cys325Tyr and Ser580Phe  
15 mutations in *LDLR*) (**Suppl. Figure 1J**). For both patients, Mo and Ly Dil-No as well as Mo Dil-  
16 Int were reduced by more than 45%, Ly Dil-Int was less profoundly decreased, and pan-uptake  
17 was reduced by over 50% (**Figure 1G, H; Suppl. Figure 1J**). Together, these data indicate that  
18 our analysis pipeline enables quantification of multiple LDL uptake parameters in major  
19 leukocyte cell populations and distinguishes defective *LDLR* function therein.

20

## 21 **Heterogeneous LDL uptake and *LDLR* surface expression in He-FH patients**

22 We next used this pipeline to characterize 21 He-FH patients from the Metabolic Syndrome in  
23 Men (METSIM) cohort study<sup>18</sup> (**Suppl. Table 1**). The patients' mutations reside in the *LDLR*  
24 coding region and range from pathogenic to likely benign variants (**Figure 2A**). Quantification of  
25 Dil-Int and Dil-No for monocytes and lymphocytes provided relatively similar results for each  
26 individual (**Figure 2B**). However, there were substantial differences in these parameters  
27 between individuals, including patients harboring identical *LDLR* mutations (**Figure 2B**). This  
28 was most pronounced for FH-North Karelia (Pro309Lysfs\*59), a pathogenic loss-of-function  
29 variant, but also evident for FH-Pogosta (Arg595Gln) and FH-Glu626Lys (**Figure 2A, B**). These  
30 observations imply that in He-FH, regulatory mechanisms may enhance the expression of the  
31 unaffected *LDLR* allele and/or stabilize the encoded protein. In support of this notion, we  
32 obtained a strong correlation between monocyte *LDLR* surface expression and Dil-Int, Dil-No  
33 and pan-uptake scores for the same individuals (pan-uptake, *R*=0.58, *p*=0.006), (**Figure 2C**,  
34 **Suppl. Figure 2A**).

35 Interestingly, the pan-uptake score showed a tendency for lower values in FH-North Karelia  
36 carriers as compared to those carrying the likely pathogenic FH-Pogosta and likely benign  
37 Glu626Lys variants (**Suppl. Figure 2B**). This is in agreement with higher LDL-c concentrations  
38 in FH-North Karelia patients<sup>19</sup>. While LDL uptake did not correlate with circulating LDL-c for the  
39 entire study group (**Suppl. Figure 2C**), this correlation was highly significant for monocyte Dil-  
40 Int, Dil-No and the pan-uptake scores for the 11 He-FH patients on statin monotherapy (Mo Dil-  
41 Int: *R*=-0.75, *p*=0.0081, **Figure 2D**). Notably, three of the individuals with the lowest monocyte  
42 Dil-Int had a two-fold higher LDL-c concentration than the three individuals with the highest  
43 monocyte Dil-Int (**Figure 2E**), suggesting that the LDL-c lowering effect of statin is reflected by  
44 monocyte LDL uptake. This is likely due to the higher LDL uptake capacity of monocytes as  
45 compared to lymphocytes (**Figure 1E, F**).

1

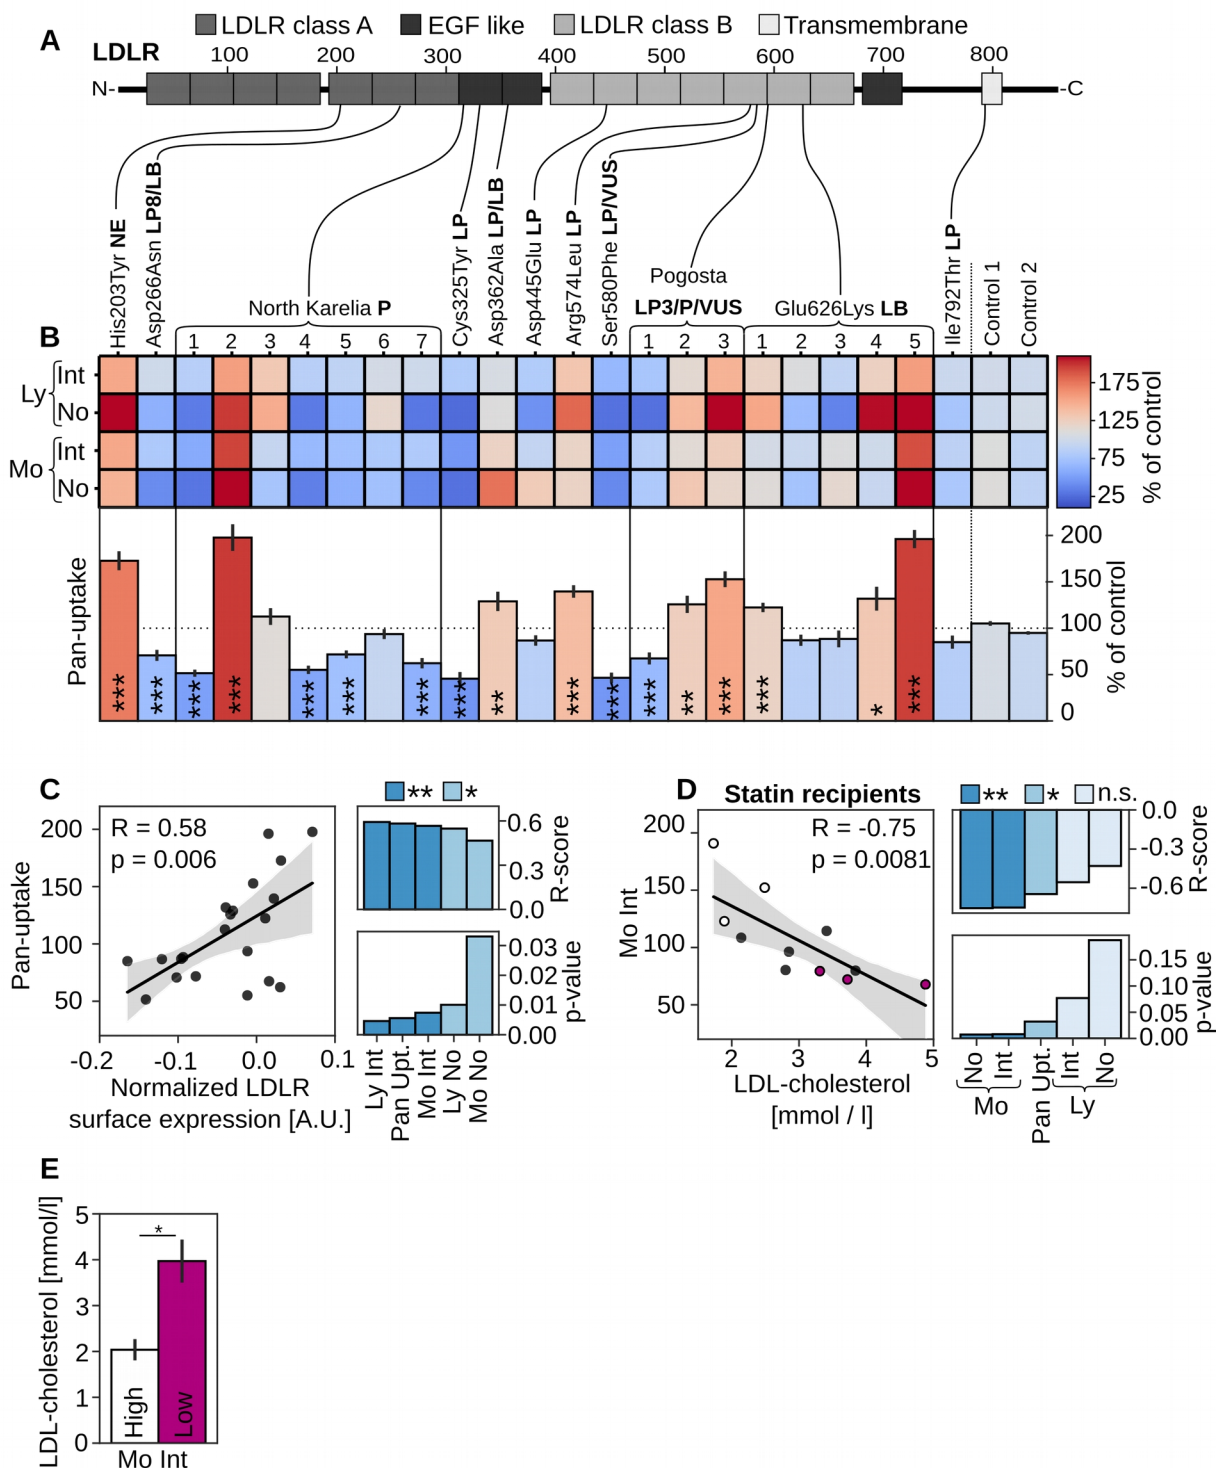

2 **Figure 2) Heterogeneous LDL uptake and LDLR surface expression in He-FH patients'**  
 3 **monocytes.** A) Schematic presentation of LDLR mutations included in this study together with

1

8



1 *their pathogenicity status from ClinVar and LOVD databases. (P = pathogenic, LP = likely*  
2 *pathogenic, LB = likely benign, VUS = variant of unknown significance. B) Quantification of*  
3 *monocyte (Mo) and lymphocyte (Ly) cellular DiI-LDL intensities (Int), organelle numbers (No)*  
4 *and pan-uptake normalized to two controls (100%); two to three independent experiments, each*  
5 *with duplicate or quadruplicate wells per patient (8-16 wells per patient for pan-uptake),*  
6 *Cys325Tyr and Ser580Phe were described in (Figure 1G, H). Significant changes to control two*  
7 *were calculated with Welch's t-test. c) Correlation of pan-uptake and monocyte LDLR surface*  
8 *expression, including R- and p-values for all uptake scores; n = 21 patients. D) Correlation of*  
9 *monocyte DiI-LDL intensities (Mo Int) with circulating LDL-c for heterozygous FH patients on*  
10 *statin monotherapy, including R- and p-values for all uptake scores. E) LDL-c concentration for*  
11 *3 patients with the highest (high) and lowest (low) monocyte mean DiI-LDL intensity (Mo Int) as*  
12 *in D. Grey areas in scatter plots indicate 95% CI, \* $p < 0.05$ , \*\*  $p < 0.01$ , \*\*\*  $p < 0.001$ .*

13

#### 14 **LDL uptake in non-FH individuals with normal or elevated circulating LDL-c**

15 As most hypercholesterolemia patients do not carry *LDLR* mutations, we also investigated  
16 cellular LDL uptake in PBMCs from 20 biobank donors with elevated LDL-c levels (LDL-c >5  
17 mM) (hLDL-c) and from 19 donors with normal LDL levels (LDL-c 2-2.5 mM) (nLDL-c) from the  
18 FINRISK population cohort<sup>20</sup> (**Suppl. Table 2**). DNA sequencing confirmed that common  
19 Finnish *LDLR* variants were not present among these subjects.

20 We quantified DiI-Int and DiI-No for monocyte and lymphocyte populations as well as the pan-  
21 uptake score for nLDL-c and hLDL-c individuals. This revealed a large interindividual variation in  
22 LDL uptake (**Figure 3A**). Both groups included persons with severely reduced LDL  
23 internalization, although the lowest pan-LDL uptake scores were among the hLDL-c individuals  
24 (**Figure 3A**). Overall, pan-uptake and Ly DiI-No were reduced in hLDL-c compared to nLDL-c  
25 subjects, but the differences were not significant (**Suppl. Figure 3A, B**). Of note, reduced pan-  
26 uptake, Mo DiI-Int and Ly DiI-No correlated with increased serum LDL-c levels in the hLDL-c  
27 subgroup, but the correlations relied on a single individual with a very high serum LDL-c  
28 concentration (pan-uptake:  $R = -0.49$ ,  $p = 0.028$ ; **Suppl. Figure 3C**).

29 To investigate additional factors influencing the interindividual variability in cellular LDL uptake,  
30 we analyzed correlations to two obesity indicators, body mass index (BMI) and waist  
31 circumference. Strikingly, reduced pan-uptake, as well as Mo DiI-Int and Ly DiI-Int correlated  
32 with increased waist circumference (pan-uptake:  $R = -0.42$ ,  $p = 0.009$ ; **Figure 3B**). Lower pan-  
33 uptake, Ly DiI-Int and Mo DiI-Int also correlated with elevated BMI (pan-uptake:  $R = -0.36$ ,  
34  $p = 0.022$ ; **Figure 3C**).

35

#### 36 **Assessment of cellular lipid storage and mobilization in leukocytes**

37 Cells store excess lipids in LDs and this is related to lipid uptake: When peripheral cells have  
38 sufficient lipids available, they typically exhibit LDs and in parallel, lipid uptake is downregulated.  
39 We therefore also included the staining of LDs in the automated analysis pipeline (**Figure 1A**).  
40 Staining of PBMCs in lipid rich conditions (CM) with the well-established LD dye LD540<sup>21</sup>  
41 revealed that lymphocytes and monocytes displayed LDs in a heterogenous fashion (**Figure**  
42 **4A**), with lymphocytes showing fewer LD positive cells and fewer LDs per cell than monocytes

1 **(Figure 4B, C)**. We then visualized the changes in LD abundance upon overnight lipid  
 2 starvation in lipoprotein deficient medium (LP) **(Figure 4B-F)**. This resulted in a pronounced

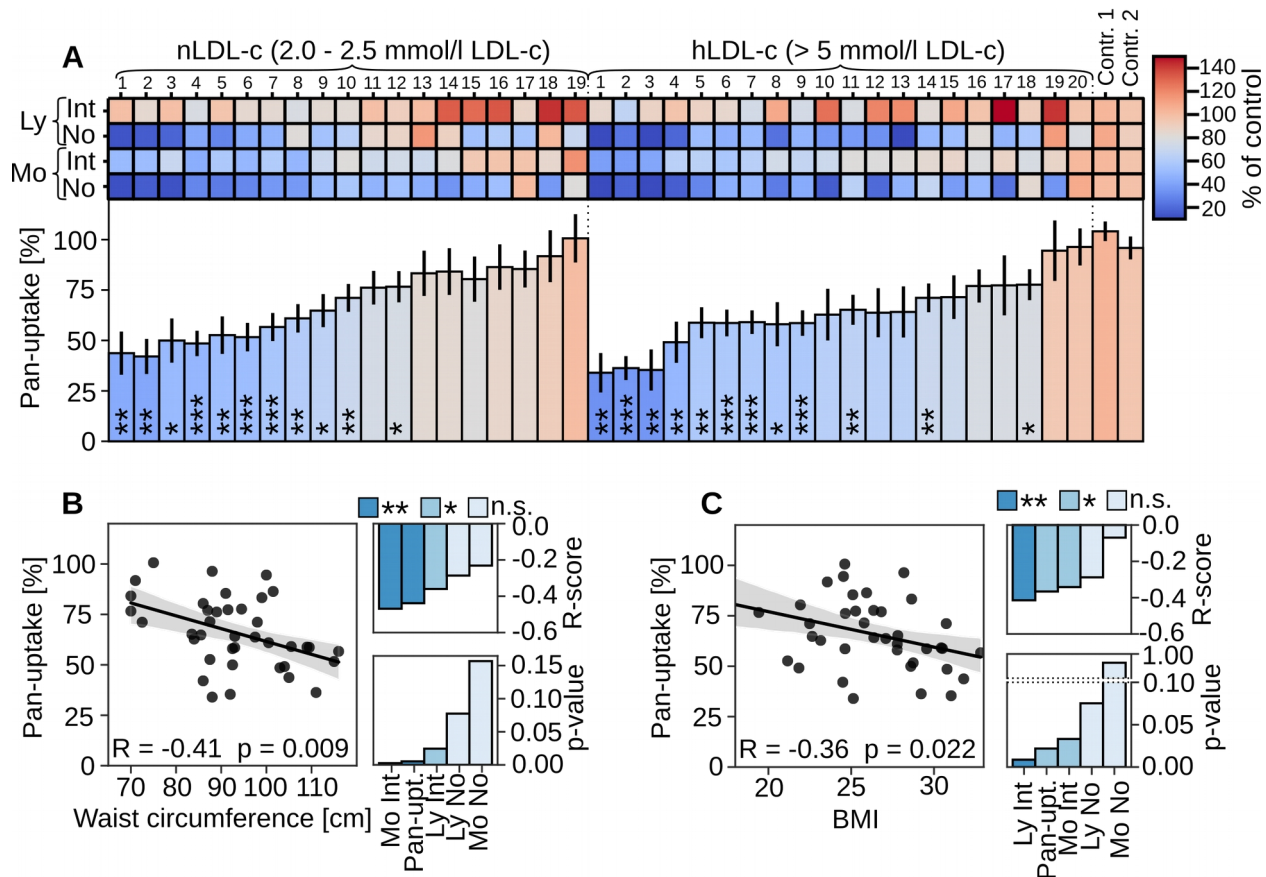

3 **Figure 3) LDL uptake profiles in non-FH individuals with normal and elevated LDL-c. A)**  
 4 **Quantification of monocyte (Mo) and lymphocyte (Ly) mean DiI-LDL intensities (Int), organelle**  
 5 **numbers (No) and pan-uptake after lipid starvation, normalized to control standards; duplicate**  
 6 **wells per patient (eight wells per patient for pan-uptake). Significant changes to control two**  
 7 **were calculated with Welch's t-test. B) Correlation of pan-uptake with waist circumference and**  
 8 **C) with body mass index (BMI), including R- and p-values for all uptake scores. n = 39. Grey**  
 9 **areas in scatter plots indicate 95% CI. \*p<0.05, \*\* p<0.01, \*\*\* p<0.001.**

10

11 decrease in lipid deposition: In CM, 9% of lymphocytes and 25% of monocytes contained LDs,  
 12 but upon lipid starvation, these were reduced to 6% (Ly) and 12% (Mo) **(Figure 4D)**.

13 Due to the lower LD abundance in lymphocytes, we focused on monocytes and defined three  
 14 readouts for them: 1) Percentage of LD-positive cells (LD-Pos), 2) Cellular LD number in LD-  
 15 Pos (LD-No) and 3) Total cellular LD Area in LD-Pos (LD-Area). On average, LD-Pos cells  
 16 showed 2.9 LDs in lipid rich conditions and 1.8 LDs upon lipid starvation **(Figure 4E)**, while the  
 17 total LD area decreased from 1.35  $\mu\text{m}^2$  in lipid rich conditions to 0.8  $\mu\text{m}^2$  upon lipid starvation  
 18 **(Figure 4F)**.

1

10

1 When quantifying LD parameters from several subjects, we observed substantial differences  
 2 between individuals in how LDs changed upon starvation. To systematically quantify these  
 3 differences, we established a parameter, lipid mobilization score, that reflects how

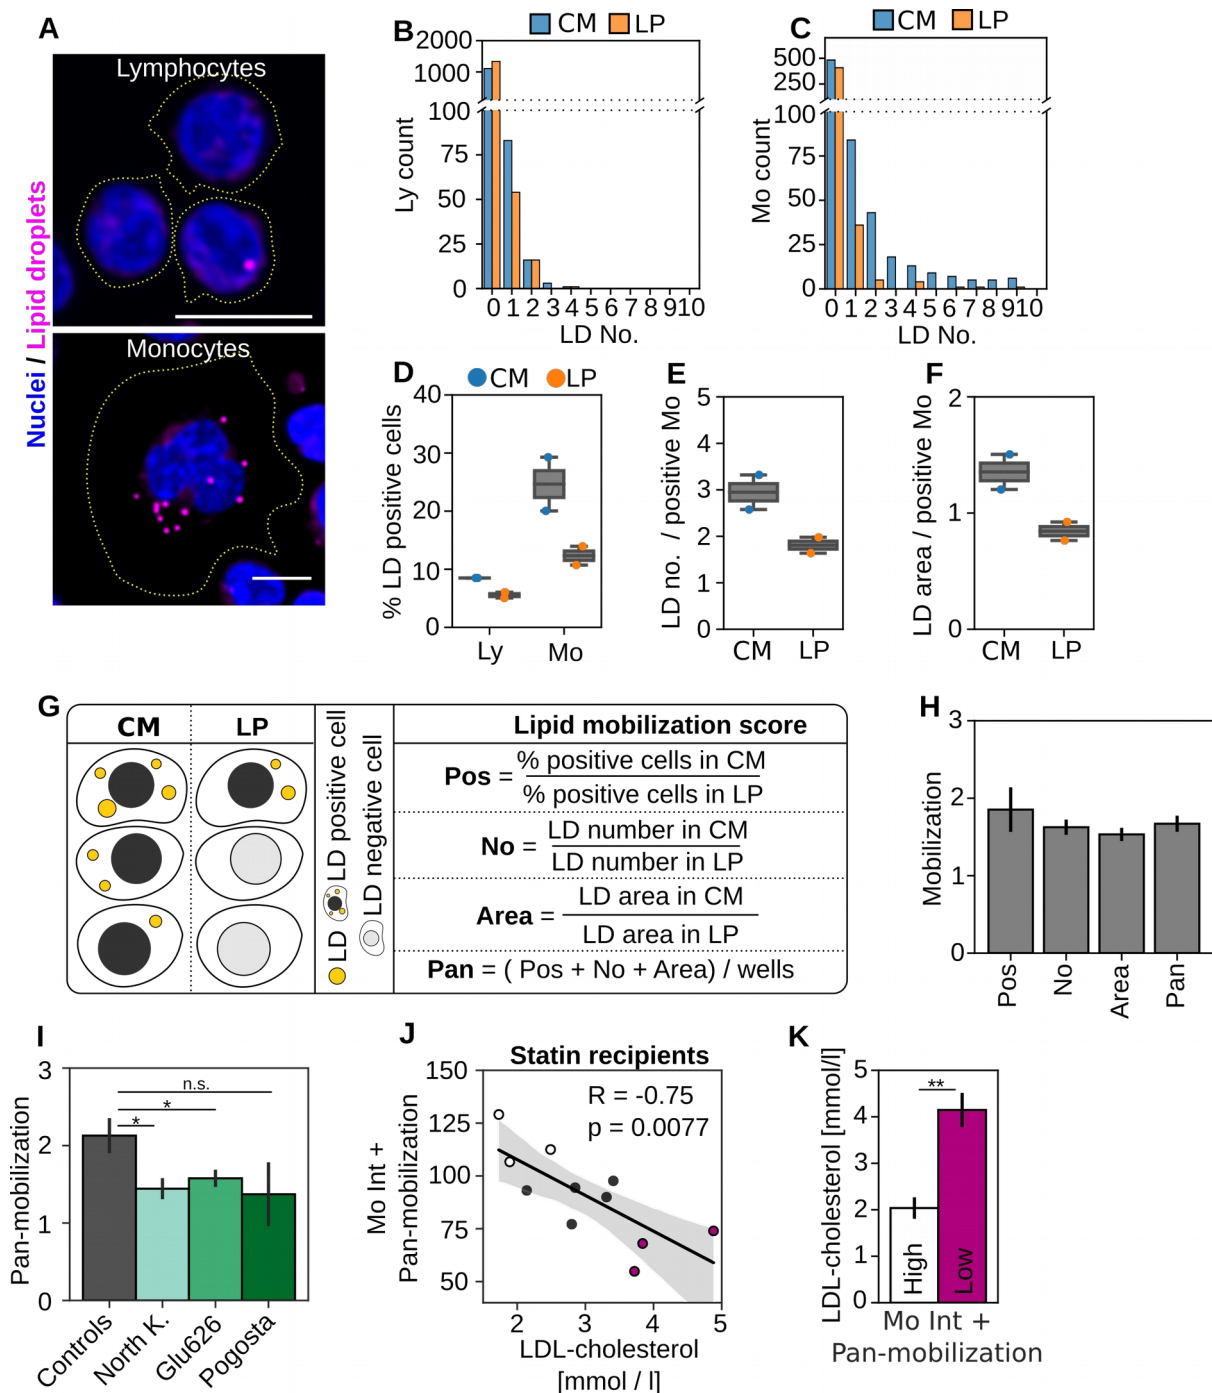

4 **Figure 4) Lipid mobilization assay.** **A)** Representative images showing lipid droplets (LDs) in  
 5 lymphocyte and monocyte populations after treatment with control medium, scale bar = 10µm.  
 6 **B)** Histogram for cellular LD counts in lymphocyte and **(C)** monocyte populations after

1 *treatment with control medium (CM) and lipid starvation (LP) from a single well. D)*  
2 *Quantification of LD positive cells in lymphocytes (Ly) and monocytes (Mo) upon treatment with*  
3 *control medium (CM) and lipid starvation (LP); representative of three independent*  
4 *experiments, each with duplicate wells per patient and treatment. E) LD counts and (F) total LD*  
5 *area in LD positive monocytes quantified for the same experiment as in (D). G) Schematic*  
6 *presentation of the lipid mobilization score. Upon lipid starvation, the fraction of LD positive*  
7 *monocytes (LD-Pos), their total LD area (LD-Area) and LD numbers (LD-No) are decreasing.*  
8 *Mobilization scores are calculated by dividing the amount of LD-Pos, LD-No or LD-Area in CM*  
9 *with the respective quantifications after lipid starvation. Pan-mobilization is the average of LD-*  
10 *Pos, LD-No and LD-Area mobilization scores from individual wells. H) Lipid mobilization*  
11 *scores for one control; n = 6 wells from three independent experiments, (18 wells for pan-*  
12 *mobilization), ± SEM. I) Pan-mobilization for controls (combined control one and two from five*  
13 *experiments), FH-North-Karelia (n = 7), FH-Pogosta (n = 3) and FH-Glu626 (n = 5). J)*  
14 *Correlation of combined monocyte mean DiI-LDL intensities (Mo Int) and pan-mobilization with*  
15 *circulating LDL-c. K) LDL-c concentration for 3 patients with the highest (high) and lowest*  
16 *(low) combined score as in J. \*p < 0.05, \*\*p < 0.01.*

17

18 efficiently cellular lipid stores are depleted under lipid starvation (**Figure 4G**). Lipid mobilization  
19 scores were calculated for each of the LD readouts, LD-Pos, LD-No and LD-Area, by dividing  
20 the results obtained in lipid rich conditions with those obtained after lipid starvation (**Figure 4G**).  
21 Furthermore, we established a pan-mobilization score by averaging LD-Pos, LD-No and LD-  
22 Area scores (**Figure 4G, H**), with LD-Pos providing the highest mobilization score but also the  
23 highest variability (**Figure 4H**).

24 To further assess the reliability of the LD mobilization parameters, we determined their  
25 intraindividual variation using the same samples as for analyzing intraindividual variation of DiI-  
26 LDL uptake (**Suppl. Figure 1I, J**). This showed a modest intraindividual variation for the lipid  
27 mobilization scores (**Suppl. Figure 4A**), which an average of 8% for pan-mobilization, 10% for  
28 LD-Pos, 11% for LD-No and 13% for LD-Area (**Suppl. Figure 4B**).

29

### 30 **Cellular lipid mobilization in He-FH patients**

31 When lipid mobilization was analyzed from the He-FH samples of the METSIM cohort, we found  
32 that the pan-mobilization score was significantly reduced in He-FH individuals carrying the FH-  
33 North Karelia and Glu626Lys variants (**Figure 4I**). This suggests that defective LDLR function  
34 may be accompanied by reduced lipid mobilization. We also studied whether the combination of  
35 a lipid mobilization score with LDL uptake improves identification of statin recipients with high  
36 residual LDL-c concentrations. Several of the patients with intermediate and high LDL-c showed  
37 low monocyte DiI-LDL intensities in a narrow range (**Figure 2D**). When monocyte DiI-Int was  
38 combined with the pan-mobilization score, larger differences between patients were observed,  
39 providing a better separation of individuals with high and intermediate LDL-c (**Figure 4J**).  
40 Moreover, the difference in LDL-c concentration between the three individuals with the highest  
41 vs. lowest score was more significant than when using monocyte DiI-Int alone (**Figure 4K vs.**  
42 **Figure 2E**). This suggests that the combined LDL uptake and lipid mobilization assays may help  
43 to better pinpoint those He-FH cases that remain refractory to statin monotherapy.

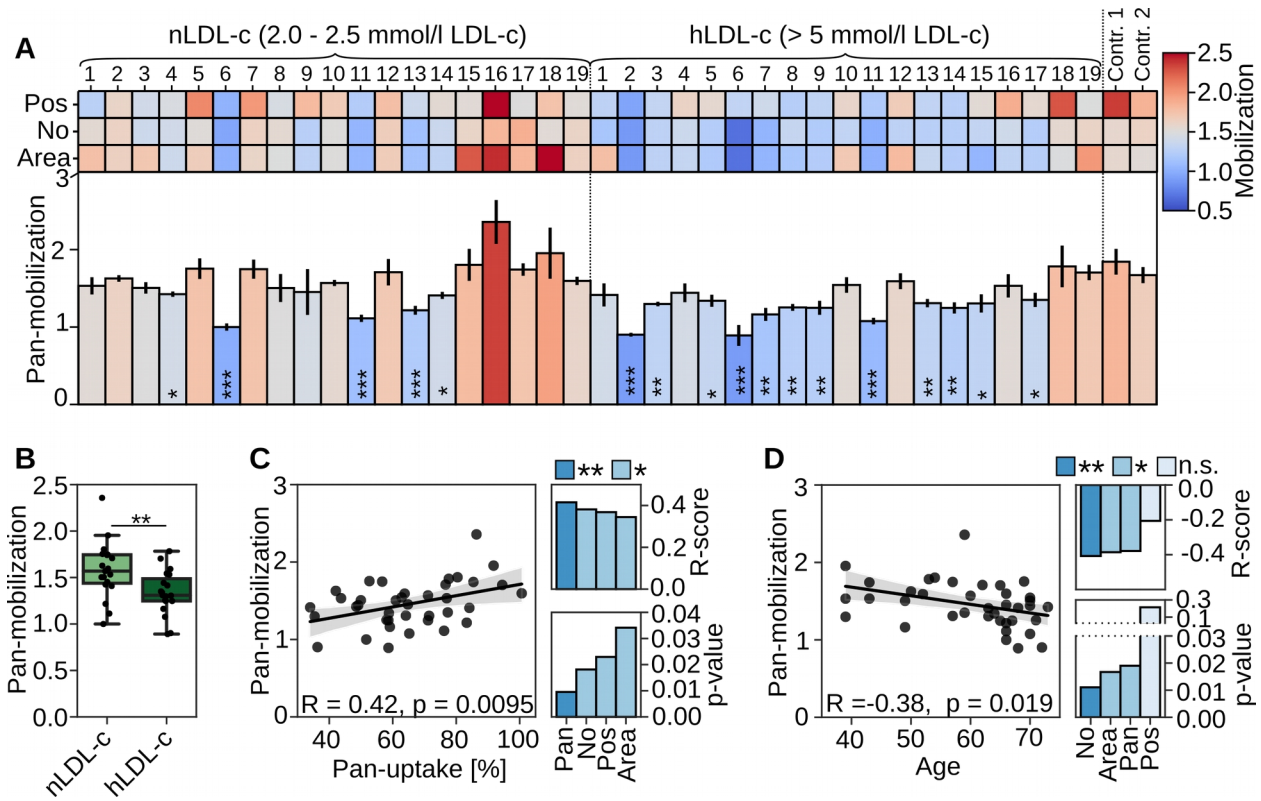

1 **Figure 5) Monocyte lipid mobilization correlates with LDL uptake and is reduced in subjects**  
 2 **with elevated LDL-c.** A) Mobilization scores (Pos, LD-No, LD-Area and pan-mobilization) in  
 3 monocytes from controls (nLDL-c, LDL-c 2-2.5 mmol/l) and individuals with elevated LDL-c  
 4 (hLDL-c, LDL > 5 mmol/l) sorted according to the pan-uptake score (Figure 3A); duplicate  
 5 wells per patient (six wells per patient for pan-mobilization). Significant changes to control two  
 6 were quantified with Welch's t-test. B) Box plot of pan-mobilization for nLDL-c and hLDL-c  
 7 subgroups; nLDL-c n = 19, hLDL-c n = 19. \*\* p < 0.01, Students t-test. Correlation of pan-  
 8 mobilization with pan-uptake (C) and age (D), including R- and p-values for all mobilization  
 9 scores. Grey areas in scatter plots = 95% CI. \* p < 0.05, \* p < 0.01, \* p < 0.001.

10

11 **Cellular lipid mobilization is reduced in non-FH hypercholesterolemia patients and**  
 12 **correlates with LDL uptake**

13 We then investigated whether monocytes from nLDL-c and hLDL-c biobank donors displayed  
 14 differences in lipid mobilization. Analogously to LDL uptake, we observed a large variability for  
 15 the pan- and individual mobilization scores in this cohort (Figure 5A). Interestingly, pan-  
 16 mobilization, LD-No and LD-Area were significantly reduced in the hLDL-c compared to nLDL-c  
 17 subjects (Figure 5A, B, Suppl. Figure 5A, B). This prompted us to scrutinize whether lipid  
 18 mobilization correlates with LDL uptake related parameters or obesity indicators in this cohort.  
 19 All mobilization scores correlated positively with the pan-uptake score (R=0.42, p=0.0095 for  
 20 pan-mobilization; Figure 5C). Furthermore, pan-, LD-No and LD-Area mobilization scores  
 21 correlated negatively with total cholesterol, apo-B concentrations (Suppl. Figure 5C, D) and  
 22 with age (R=-0.38, p=0.019 for pan-mobilization; Figure 5D).

1

13

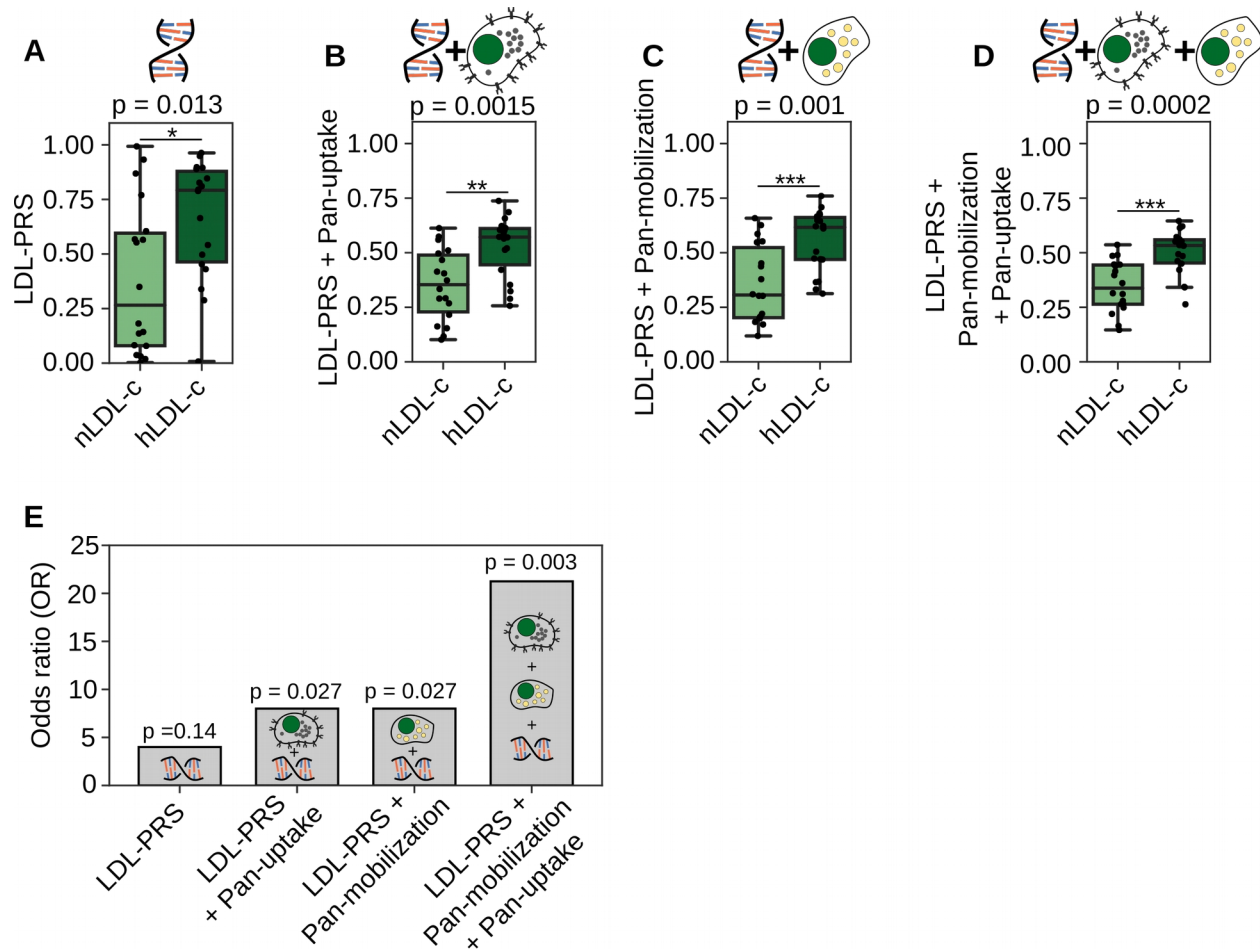

1 **Figure 6) Hybrid scores combining genetic and functional cell-based data show improved**  
 2 **association with hypercholesterolemia.** A) Box plot of a polygenic risk score for high LDL-c  
 3 levels (LDL-PRS) for nLDL-c (2-2.5 mmol/l LDL-c) and hLDL-c (>5 mmol/l LDL-c) subgroups.  
 4 B) Box plot for double hybrid scores combining LDL-PRS and pan-uptake or pan-mobilization  
 5 (C) into a single score. D) Box plot for a triple hybrid score consisting of LDL-PRS, pan-uptake  
 6 and mobilization. nLDL-c n = 18, hLDL-c n = 19, \*  $p < 0.05$ , \*\*  $p < 0.01$ , \*\*\*  $p < 0.001$ ; Welch's  
 7 t-test. E) Odds ratio (OR) for 30% of the individuals with the highest LDL-PRS, double or triple  
 8 hybrid scores and the remaining subjects, calculated with the Fisher's exact probability test.

9

10 **Hybrid scores of genetic and functional cell-based data show improved association with**  
 11 **hypercholesterolemia**

12 The hLDL-c biobank donors of the FINRISK population cohort displayed an increased LDL-c  
 13 polygenic risk score (LDL-PRS) (Figure 6A). LDL-PRS did not correlate with LDL uptake or lipid  
 14 mobilization (Suppl. Figure 6A, B), suggesting that LDL-PRS and cellular LDL uptake monitor  
 15 in part distinct processes. Interestingly, combination of LDL-PRS with pan-uptake reduced the  
 16 variation and made it easier to discriminate the nLDL-c and hLDL-c groups, providing an eight  
 17 times better p-value as compared to LDL-PRS only (Figure 6B). Furthermore, combination of  
 18 the pan-mobilization score with LDL-PRS drastically improved the discrimination between

1

14

1 groups (**Figure 6C**) and combining all three parameters, i.e. LDL-PRS, pan-uptake and pan-  
2 mobilization, provided the best discrimination power and lowest p-value (**Figure 6D**). To  
3 estimate the association of LDL-PRS and novel hybrid scores with elevated LDL-c (>5 mmol/l),  
4 we calculated the odds ratio (OR) for elevated LDL-c by comparing individuals with the highest  
5 30% of the score to the remaining subjects. Combining LDL-PRS with either pan-uptake or pan-  
6 mobilization doubled the OR and using a hybrid score combining all three readouts resulted in a  
7 five-fold higher OR (**Figure 6E**).

8

## 1 **Discussion:**

2 In this study, we established a multiplexed analysis pipeline to quantify lipid uptake and  
3 mobilization in primary leukocytes and used it to analyze over 300 conditions (combinations of  
4 assays and treatments) from 65 individuals. The automated cell handling, staining and imaging  
5 procedures enable high-throughput applications. Key advantages of the method are: 1) Large-  
6 scale internal standards allow comparison of experimental results over time, 2) Automated cell  
7 quantification avoids researcher bias, increasing reliability of results, 3) Semi-automated  
8 workflow can be scaled to increase throughput, 4) Cell immobilization on coated surfaces allows  
9 flexibility in sample handling and facilitates automation, 5) Lymphocyte- and monocyte-enriched  
10 cell populations can be detected based on cell spreading on coated surfaces, 6) Subcellular  
11 resolution enables quantification of internalized LDL and LDs, yielding new scores derived from  
12 them. While the first two aspects are or can be readily included in conventional flow cytometry  
13 based LDL uptake assays, the latter four rely on a high-content high-resolution imaging  
14 platform.

15 Several of the observations made using this analysis pipeline are supported by previous  
16 findings obtained using manual assays, thereby validating our results. We showed that  
17 monocytes display higher LDL uptake activities than lymphocytes, in accordance with previous  
18 findings<sup>16</sup>. The highly variable LDL uptake observed by us between individuals, including He-FH  
19 patients with identical *LDLR* mutations, also agrees with earlier reports<sup>10-12</sup>. Furthermore, we  
20 observed an association of low cellular LDL uptake with increased circulating LDL-c in He-FH  
21 patients on statin monotherapy, in line with studies utilizing radiolabelled LDL<sup>22-25</sup>. However, this  
22 finding was not readily reproduced by using fluorescently labelled LDL particles in  
23 lymphocytes<sup>26,27</sup>. Indeed, our results indicate that monocytes provide an improved detection  
24 window and a better correlation between cellular LDL uptake and circulating LDL-c.

25 We also found that reduced LDL uptake correlated with increased BMI and waist circumference,  
26 two obesity indicators. Metabolic syndrome is typically linked to dyslipidemia characterized by  
27 decreased high-density lipoprotein cholesterol (HDL-c), elevated LDL-c with increased small  
28 dense LDL particles and increased plasma triglycerides<sup>37</sup>. Our results suggest, that besides  
29 VLDL overproduction and defective lipolysis of TG-rich lipoproteins<sup>1</sup>, reduced LDL clearance  
30 may contribute to dyslipidemia in overweight individuals. This fits with the observed reduction of  
31 *LDLR* expression in obese subjects<sup>38</sup>.

32 Moreover, we employed the platform to quantify cellular LDs, established a new parameter  
33 termed lipid mobilization score, and demonstrated its ability to provide additional data on  
34 individual differences on lipid handling. Lipid mobilization correlated with LDL uptake, implying  
35 that efficient removal of stored lipids was typically paralleled by efficient lipid uptake. Moreover,  
36 combining monocyte LDL uptake and lipid mobilization data facilitated the detection of He-FH  
37 cases that remained hypercholesterolemic on statin. In the FINRISK population cohort, lipid  
38 mobilization outperformed LDL uptake in distinguishing individuals with high (>5 mmol/l) and  
39 normal LDL-c (2-2.5 mmol/l), with impaired lipid mobilization associating with elevated LDL-c.  
40 Hence, lipid mobilization shows potential to highlight additional aspects of cellular lipid  
41 metabolism underlying hypercholesterolemia in individual patients.



1 Polygenic risk scores (PRS) provide tools for cardiovascular risk profiling and are increasingly  
2 included in clinical care guidelines of hypercholesterolemia<sup>1,28</sup>. We found that the  
3 hypercholesterolemia subjects of the FINRISK cohort had an increased LDL-PRS, but this did  
4 not correlate with LDL uptake or lipid mobilization, arguing that the cell-based parameters cover  
5 in part different territories than PRS. In agreement, the combination of LDL-uptake, lipid  
6 mobilization and LDL-PRS improved the segregation of hyper- and normocholesterolemic  
7 subjects. An increased LDL-PRS is associated with a higher incidence of coronary artery  
8 disease<sup>5</sup>. We therefore anticipate that the cell-based assays may provide additional information  
9 for future integrated CVD risk calculations. These, in turn, might facilitate the detection of  
10 hypercholesterolemia risk at younger age when clinical manifestations are not yet overt,  
11 enabling faster initiation of treatment and improved disease prevention<sup>29</sup>.

12 In summary, the automated analysis platform established here enables systematic assessment  
13 of cellular lipid trafficking in accessible primary cell samples of human origin. Besides  
14 hypercholesterolemia, this approach can be useful in other metabolic disorders, as well as  
15 diseases not previously linked to cellular lipid imbalance. As an example of the latter, we  
16 recently uncovered aberrant LD size distribution in MYH9-related disease patient neutrophils  
17 using quantitative imaging<sup>30</sup>.

18

#### 19 **Limitations of the study:**

20 We analyzed 65 individuals as a proof-of-concept for the analysis platform. Whilst this  
21 outperforms most previous studies measuring lipid uptake in primary cells, further validation in  
22 larger study groups will be required. Such studies will be feasible due to the high automation  
23 level of the platform, enabling processing of samples from several thousand subjects per year.

24 Regarding the cellular origin of hypercholesterolemia, we infer parameters related to whole body  
25 metabolism and in particular liver function from PBMCs. Evidently, primary hepatocytes would  
26 provide more direct information, but are not accessible on a routine basis. PBMCs are easily  
27 obtained from standard blood collections. Moreover, our data demonstrate that PBMC derived  
28 parameters can correlate with readouts deriving from the whole body level.

29 Currently, the analysis platform is set up to quantify two cellular parameters, LDL uptake and  
30 lipid storage in droplets. In the future, the utility of the platform can be further extended by the  
31 inclusion of additional fluorescence based readouts amenable to high-content imaging and  
32 quantification.

## 1 **Acknowledgements:**

2 We thank Anna Uro for technical assistance, HiLIFE and Biocenter Finland supported Helsinki  
3 Bioluminescence imaging infrastructures for help with microscopy, Katariina Öörni for help with LDL  
4 preparation and Abel Szkalitsy for help with image analysis. We thank THL Biobank for  
5 providing samples and data for this study (study no: 2016\_15, 2016\_117 and 2018\_15) and all  
6 biobank donors for their participation in biobank research.

7 This study was supported by The Academy of Finland (grants 282192, 284667, 307415 to EI;  
8 321428 to ML; 310552 to LP; 328861, 325040 to SP; and 312062, 316820 to SR), Sigrid  
9 Juselius Foundation (grants to EI, ML SR), University of Helsinki (grant to KK; Faculty of  
10 Medicine early-career investigator grant to SP; HiLIFE Fellow grant to EI), Finnish Foundation  
11 for Cardiovascular Research and University of Helsinki HiLIFE Fellow and Grand Challenge  
12 grants, and H2020-INTERVENE (101016775) to SR, Fondation Leducq (grant 19CVD04 to EI),  
13 MIUR of Italy (project cod. PON03PE\_00060\_7, grant to CEINGE, G.F.), LENDULET-BIOMAG  
14 Grant (2018-342), H2020-discovAIR (874656), and Chan Zuckerberg Initiative (seed networks  
15 for the HCA-DVP) to PH. Ida Montin Foundation (grant to PR), Doctoral Programme in  
16 Population Health, University of Helsinki (grant to PR); Emil Aaltonen Foundation (grant to PR).

17

## 18 **Author Contributions:**

19 S.G.P and E.I. designed the study and developed the concept. S.G.P, I.B., K.K., I.H., and P.R.  
20 performed experiments. S.G.P, I.B., K.K. I.H., P.R., M.M.I., S.R. and E.I. analyzed data and  
21 interpreted results, A.K., M.D.T., A.S.F., G.F., J.K. and M.L. provided patient samples and  
22 clinical data. L.P. and P.H. established image analysis and processing tools. S.G.P and E.I.  
23 wrote the manuscript. All authors reviewed and revised the manuscript.

24

## 25 **Declaration of Interests:**

26 A patent application covering the use of the here suggested patient stratification methods has  
27 been filed (Application: FI 20206284) in which University of Helsinki is the applicant and EI and  
28 SP are the inventors.

29

30

## 31 **STAR Methods:**

32 **Materials:** Lipoprotein deficient serum (LPDS) was obtained from fetal bovine serum by  
33 ultracentrifugation as described<sup>31</sup>. For Dil-LDL, we first prepared fresh LDL from human plasma  
34 samples (Finnish Red Cross permit 39/2016) by density centrifugation<sup>32</sup> and then labelled LDL  
35 with 1,1'-dioctadecyl-3,3',3'-tetramethyl-indocarbocyanine perchlorate (Dil) as described<sup>33</sup>.  
36 4',6-diamidino-2-phenylindole (DAPI), Poly-D lysine (PDL) and Histopacque Premium were  
37 obtained from Sigma. Dil, anti-mouse Alexa 568, HCS CellMask Deep Red and HCS CellMask  
38 Green were obtained from Thermo Fisher. Mouse anti-LDLR (clone 472413) was from R&D  
39 systems.

40

1 **Peripheral blood mononuclear cells (PBMC) and blood samples:** All blood samples were  
2 collected in accordance with the declaration of Helsinki regarding experiments involving  
3 humans. He-FH patients were identified in the Metabolic Syndrome in Men study (METSIM)<sup>18</sup>  
4 and blood samples obtained during patient follow-up. Two He-FH patients (Cys325Tyr and  
5 Ser580Phe) for which we obtained PBMC and EBV lymphoblast samples were described  
6 previously<sup>34</sup>. PBMC samples from the Finnish population survey, FINRISK 2012, and the donor  
7 linked data (including genotypes) were obtained from THL Biobank ([www.thl.fi/biobank](http://www.thl.fi/biobank)) and  
8 used under the Biobank agreements no 2016\_15, 2016\_117 and 2018\_15. The FINRISK 2012  
9 study groups consisting of donors with elevated LDL-c levels (LDL > 5 mM, hLDL-c) and normal  
10 levels (LDL-c 2.0-2.5 mM, nLDL-c) were age, gender and BMI matched. The donors in neither  
11 of groups had cholesterol lowering medication by the time of sampling, and based on a food  
12 frequency questionnaire, did not receive an elevated proportion of energy intake as saturated or  
13 trans-fat. Buffy coat samples from healthy blood donors were obtained from the Finnish Red  
14 Cross (permit 392016). Three healthy volunteers donated blood samples on two consecutive  
15 days after overnight fasting, to assess the intraindividual variation of LDL uptake and lipid  
16 mobilization.

17 **Cell culture:** Control EBV lymphoblasts (GM14664) were obtained from Coriell Cell Repository  
18 and cultured in RPMI-1640 supplemented with 15% FBS, penicillin/streptomycin (100 U/ml  
19 each) and 2 mM L-Glutamine. For continuous culturing of EBV lymphoblasts,  $3 \times 10^6$  cells were  
20 transferred to 5 ml of fresh medium once a week. Cells were cryopreserved in 70% PBMC  
21 medium (RPMI-1640, penicillin/streptomycin, 2 mM L-glutamine, 1 mM sodium pyruvate, and 1  
22 mM HEPES), 20% FBS and 10% DMSO.

23 **PBMC isolation:** Blood or buffy coat samples were mixed 1:1 with phosphate buffered saline  
24 (PBS) including 2.5 mM EDTA (PBS-E). The blood mixture was gently layered over Histopaque  
25 Premium (1.0073, for mononuclear cells) and centrifuged 40 min at 400 g. The PBMC cell layer  
26 was removed, transferred to a new 15 ml reaction tube and mixed with PBS-E. Cells were  
27 centrifuged at 400 g for 10 min and incubated in 2 ml of red blood cell lysis buffer for 1 min (155  
28 mM  $\text{NH}_4\text{Cl}$ , 12 mM  $\text{NaHCO}_3$ , 0.1 mM EDTA). 10 ml of PBS-E was added and cells were pelleted  
29 and washed with PBS-E. Then cells were resuspended in 5 ml PBMC medium (RPMI-1640,  
30 penicillin/streptomycin, 2 mM L-glutamine, 1 mM sodium pyruvate, and 1 mM HEPES), counted,  
31 pelleted and cryopreserved.

32 **Cell treatments, Dil-LDL uptake, transfer to imaging plates and fixation:** Cryopreserved  
33 EBV lymphoblasts or PBMCs were thawed in PBMC medium, and centrifuged at 400 g for 10  
34 min. The cells were resuspended in PBMC medium and transferred to a well of a 96 well plate  
35 (200000 cells per well), containing FBS (10% final concentration) or LPDS (5% final  
36 concentration) and incubated for 24 h. Cells were then incubated with freshly thawed Dil-LDL at  
37  $30 \mu\text{g} / \text{ml}$  final concentration for 1 h at  $37^\circ\text{C}$ , which yielded an optimal signal intensity at a linear  
38 detection range in PBMCs. Subsequently, cells were transferred to conical 96 well plates and  
39 centrifuged at 400 g for 10 min. Using a robotic platform (Opentrons, New York, USA) medium  
40 was removed and cells were resuspended in PBMC medium. Cells were centrifuged,  
41 automatically resuspended in PBMC medium and transferred to PDL coated 384 well high-  
42 content imaging plates (approximately 40 000 cells/well, a density where individual cells are not  
43 on top but close to each other). The robotic resuspension ensured homogenous cell adhesion to  
44 the imaging plates. After 30 min of incubation at  $37^\circ\text{C}$  cells were automatically fixed with 4%  
45 paraformaldehyde in 250 mM HEPES, 1 mM  $\text{CaCl}_2$ ,  $100 \mu\text{M}$   $\text{MgCl}_2$ , pH 7.4 and washed with  
46 PBS. For lipid droplet and LDLR surface stainings, cells were directly transferred to PDL coated  
47 384 well high-content plates, adhered, automatically fixed and washed with PBS.

1

2 **Lipid droplet analyses:** Cells were processed as described before<sup>27</sup> with the following  
3 changes: Fixed cell samples were automatically stained with 1 µg/ml LD540 (Princeton  
4 BioMolecular Research) and 5 µg/ml DAPI. 3D stacks of optical slices were acquired  
5 automatically either with a Nikon Eclipse Ti-E inverted microscope equipped with a 40 ×  
6 Planfluor objective with NA 0.75 and 1.5 zoom; duplicate wells, each with six image fields per  
7 patient, or with a PerkinElmer Opera Phenix High Content Imaging system with a 63x water  
8 immersion objective, NA 1.15; duplicate wells, each with 14, 16 (two wells combined) or 24 (two  
9 wells combined) image fields. Image stacks were automatically deconvolved either with  
10 Huygens software (Scientific Volume Imaging, b.v.) or a custom-made Python tool based on the  
11 open-source tools PSF generator<sup>35</sup> and deconvolution lab<sup>36</sup>. Maximum intensity projections were  
12 made from the deconvolved image stacks with custom Python tools. Automated quantification of  
13 lipid droplets was performed as described previously<sup>30,37,38</sup>.

14 **LDLR surface staining:** All staining procedures were performed automatically. Fixed cells were  
15 quenched with 50 mM NH<sub>4</sub>Cl for 15 min and washed twice with PBS. Cells were incubated with  
16 block solution (PBS, 1% BSA) for 10 min followed by staining with mouse anti-LDLR in block  
17 solution for 60 min. Cells were washed three times with PBS followed by incubation with  
18 secondary antibody solution (anti-mouse-Alexa 568, DAPI 5 µg/ml and HCS CellMask Green  
19 stain 0.25 µg/ml) for 45 min at room temperature. Cells were washed with PBS and 3D stacks of  
20 optical slices were acquired for DAPI (nuclei), CellMask Green (cytoplasm), Alexa 568 (LDLR  
21 surface) and Alexa 640 (background) channels using an Opera Phenix high-content imaging  
22 system with a 40x water immersion objective NA 1.1; quadruplicate wells, each with seven  
23 image fields per patient. LDLR surface and background images were automatically deconvolved  
24 with our custom build Python deconvolution tools and maximum intensity projections were  
25 made. The resulting images were automatically analysed with CellProfiler<sup>39</sup>. LDLR surface  
26 intensities were background subtracted for each individual cell and normalized by subtracting  
27 mean LDLR surface intensities from the two controls, which were included in each imaging  
28 plate.

29 **Quantification of Dil-LDL uptake:** Dil-LDL labeled, and fixed cells (see section cell treatments)  
30 were automatically processed with a robotic platform (Opentrons). Cells were stained with 5 µg/  
31 ml DAPI and 0.5 µg/ml HCS CellMask Deep Red and image stacks for three channels, DAPI  
32 (nuclei), Dil-LDL and CellMask Deep Red (cytoplasm) were acquired. Automated microscopy  
33 and single cell quantifications with CellProfiler were performed as described in the section LDLR  
34 surface staining; Quadruplicate wells, each with 7 image fields for heterozygous FH patients;  
35 duplicate wells, each with 13 image fields for FINRISK subjects. Plate effects were determined  
36 with control samples and corrected for in the individual experiments.

37 **LDL-c polygenic risk score (LDL-PRS):** Genotyping of FINRISK2012 samples has been  
38 previously described<sup>5</sup> We calculated the LDL PRS using the LDpred method based on both an  
39 European genome-wide association study (GWAS) meta-analysis with 56945 samples and the  
40 previously published PRS by *Talmud et al.*<sup>4,40</sup>. The PRS calculation is described in detail in the  
41 Supplemental materials. LDL uptake and lipid mobilization parameters were normalized to a  
42 range from 0 to 1 to generate uptake and mobilization scores. Hybrid scores represent the  
43 average of LDL-PRS and uptake and/or mobilization scores which were normalized to a range  
44 from 0 to 1.

1

20

1 **Data analysis:** Segmented images from CellProfiler underwent routine visual controls to verify  
2 cell identification and filter out potential imaging artifacts. Then, lymphocytes and monocytes  
3 were detected based on the size of the cytoplasm (Ly <115  $\mu\text{m}^2$ , Mo >115  $\mu\text{m}^2$ ) (See Suppl.  
4 Figure 1). We averaged the cellular mean DiI-LDL intensities and organelle counts for each cell  
5 population and well and normalized them to the average of both controls included in each plate,  
6 set to 100%. For LD quantifications we first selected monocytes with at least one LD. We then  
7 averaged cellular LD number and total LD area (LD number x LD size) for each well. For lipid  
8 mobilization we first averaged the control medium results for LD-Pos, LD-No, and LD-area from  
9 duplicate wells and then divided these by the respective per well results after lipid starvation.  
10 We used Python (Python Software Foundation, [www.python.org](http://www.python.org)) with the following packages to  
11 perform the single cell data analysis (Pandas, Numpy, Scipy, Matplotlib<sup>41</sup>, Seaborn<sup>42</sup>). For  
12 statistical significance testing we utilized aggregated single cell data at the level of individual  
13 wells (n = number of wells per treatment and patient). First, we performed Levene's test to  
14 assess the equality of sample variation. For equal sample amounts and variance, we carried out  
15 a two-tailed Student's t-test. For unequal samples or variance, we utilized Welch's t-test. For  
16 correlations we first performed a linear regression of the two measurements and then calculated  
17 a two-sided p-value for a hypothesis test whose null hypothesis is that the slope is zero, using  
18 Wald Test with t-distribution of the test statistic. Fisher's exact probability test was used to  
19 calculate the odds ratio. Among the FINRISK2012 hLDL-c subgroup there is one individual with  
20 a serum LDL-c of 10.1 mmol / l. We performed a sensitivity analysis by removing this subject  
21 from our analysis, to verify that the major conclusions of this study are not affected by this  
22 individual.

23 **Data and code availability:** The data supporting the findings of this study are available from  
24 the authors upon request. Genetic data for the subjects of the FINRISK cohort study is available  
25 from the THL Biobank (<https://thl.fi/en/web/thl-biobank>). Custom python tools for image  
26 processing and deconvolution can be accessed via: <https://github.com/lopaavol/Oputils>.  
27 Software tools for lipid droplet detection have been described previously<sup>38</sup> and are available via:  
28 <https://bitbucket.org/szkabel/lipidanalyzer/get/master.zip>

## 1 **References:**

1. Borén, J. *et al.* Low-density lipoproteins cause atherosclerotic cardiovascular disease: pathophysiological, genetic, and therapeutic insights: a consensus statement from the European Atherosclerosis Society Consensus Panel. *Eur. Heart J.* (2020) doi:10.1093/eurheartj/ehz962.
2. Abul-Husn, N. S. *et al.* Genetic identification of familial hypercholesterolemia within a single U.S. health care system. *Science* **354**, aaf7000 (2016).
3. Khera, A. V. *et al.* Diagnostic Yield and Clinical Utility of Sequencing Familial Hypercholesterolemia Genes in Patients With Severe Hypercholesterolemia. *Journal of the American College of Cardiology* **67**, 2578–2589 (2016).
4. Talmud, P. J. *et al.* Use of low-density lipoprotein cholesterol gene score to distinguish patients with polygenic and monogenic familial hypercholesterolaemia: a case-control study. *The Lancet* **381**, 1293–1301 (2013).
5. Ripatti Pietari *et al.* Polygenic Hyperlipidemias and Coronary Artery Disease Risk. *Circulation: Genomic and Precision Medicine* **13**, e002725 (2020).
6. Ray, K. K. *et al.* EU-Wide Cross-Sectional Observational Study of Lipid-Modifying Therapy Use in Secondary and Primary Care: the DA VINCI study. *European Journal of Preventive Cardiology* (2020) doi:10.1093/eurjpc/zwaa047.
7. Snijder, B. *et al.* Image-based ex-vivo drug screening for patients with aggressive haematological malignancies: interim results from a single-arm, open-label, pilot study. *Lancet Haematol* **4**, e595–e606 (2017).
8. Romano, M. *et al.* Identification and functional characterization of LDLR mutations in familial hypercholesterolemia patients from Southern Italy. *Atherosclerosis* **210**, 493–496 (2010).

9. Benito-Vicente, A. *et al.* Validation of LDLr Activity as a Tool to Improve Genetic Diagnosis of Familial Hypercholesterolemia: A Retrospective on Functional Characterization of LDLr Variants. *International Journal of Molecular Sciences* **19**, 1676 (2018).
10. Urdal, P., Leren, T. P., Tonstad, S., Lund, P. K. & Ose, L. Flow cytometric measurement of low density lipoprotein receptor activity validated by DNA analysis in diagnosing heterozygous familial hypercholesterolemia. *Cytometry* **30**, 264–268 (1997).
11. Tada, H. *et al.* A novel method for determining functional LDL receptor activity in familial hypercholesterolemia: Application of the CD3/CD28 assay in lymphocytes. *Clinica Chimica Acta* **400**, 42–47 (2009).
12. Thedrez Aurélie *et al.* Homozygous Familial Hypercholesterolemia Patients With Identical Mutations Variably Express the LDLR (Low-Density Lipoprotein Receptor). *Arteriosclerosis, Thrombosis, and Vascular Biology* **38**, 592–598 (2018).
13. Ikonen, E. Cellular cholesterol trafficking and compartmentalization. *Nat. Rev. Mol. Cell Biol.* **9**, 125–138 (2008).
14. Luo, J., Yang, H. & Song, B.-L. Mechanisms and regulation of cholesterol homeostasis. *Nat Rev Mol Cell Biol* **21**, 225–245 (2020).
15. Chan, P., Jones, C., Lafrenière, R. & Parsons, H. G. Surface expression of low density lipoprotein receptor in EBV-transformed lymphocytes: characterization and use for studying familial hypercholesterolemia. *Atherosclerosis* **131**, 149–160 (1997).
16. Schmitz G, Brüning T, Kovacs E & Barlage S. Fluorescence flow cytometry of human leukocytes in the detection of LDL receptor defects in the differential diagnosis of hypercholesterolemia. *Arteriosclerosis and Thrombosis: A Journal of Vascular Biology* **13**, 1053–1065 (1993).

17. Piccaluga, P. P., Weber, A., Ambrosio, M. R., Ahmed, Y. & Leoncini, L. Epstein–Barr Virus-Induced Metabolic Rearrangements in Human B-Cell Lymphomas. *Front Microbiol* **9**, (2018).
18. Laakso, M. *et al.* The Metabolic Syndrome in Men study: a resource for studies of metabolic and cardiovascular diseases. *J. Lipid Res.* **58**, 481–493 (2017).
19. Lahtinen, A. M., Havulinna, A. S., Jula, A., Salomaa, V. & Kontula, K. Prevalence and clinical correlates of familial hypercholesterolemia founder mutations in the general population. *Atherosclerosis* **238**, 64–69 (2015).
20. Borodulin, K. *et al.* Cohort Profile: The National FINRISK Study. *Int J Epidemiol* **47**, 696–696i (2018).
21. Spandl, J., White, D. J., Peychl, J. & Thiele, C. Live Cell Multicolor Imaging of Lipid Droplets with a New Dye, LD540. *Traffic* **10**, 1579–1584 (2009).
22. Hagemenas F C & Illingworth D R. Cholesterol homeostasis in mononuclear leukocytes from patients with familial hypercholesterolemia treated with lovastatin. *Arteriosclerosis: An Official Journal of the American Heart Association, Inc.* **9**, 355–361 (1989).
23. Hagemenas, F. C., Pappu, A. S. & Illingworth, D. R. The effects of simvastatin on plasma lipoproteins and cholesterol homeostasis in patients with heterozygous familial hypercholesterolaemia. *European Journal of Clinical Investigation* **20**, 150–157 (1990).
24. Gaddi, A. *et al.* Pravastatin in heterozygous familial hypercholesterolemia: Low-density lipoprotein (LDL) cholesterol-lowering effect and LDL receptor activity on skin fibroblasts. *Metabolism* **40**, 1074–1078 (1991).
25. Sun, X.-M., Patel, D. D., Knight, B. L. & Soutar, A. K. Influence of genotype at the low density lipoprotein (LDL) receptor gene locus on the clinical phenotype and response to lipid-lowering drug therapy in heterozygous familial hypercholesterolaemia. *Atherosclerosis* **136**, 175–185 (1998).



26. Raungaard, B., Brorholt Petersen, J. U., Jensen, H. K. & Færgeman, O. Flow Cytometric Assessment of Effects of Fluvastatin on Low-Density Lipoprotein Receptor Activity in Stimulated T-Lymphocytes from Patients with Heterozygous Familial Hypercholesterolemia. *The Journal of Clinical Pharmacology* **40**, 421–429 (2000).
27. Homma, K. *et al.* Changes in ultracentrifugally separated plasma lipoprotein subfractions in patients with polygenic hypercholesterolemia, familial combined hyperlipoproteinemia, and familial hypercholesterolemia after treatment with atorvastatin. *Journal of Clinical Lipidology* **9**, 210–216 (2015).
28. Mach, F. *et al.* 2019 ESC/EAS guidelines for the management of dyslipidaemias: Lipid modification to reduce cardiovascular risk. *Atherosclerosis* **290**, 140–205 (2019).
29. Wiegman, A. *et al.* Familial hypercholesterolaemia in children and adolescents: gaining decades of life by optimizing detection and treatment. *Eur Heart J* **36**, 2425–2437 (2015).
30. Pfisterer, S. G. *et al.* Role for formin-like 1-dependent acto-myosin assembly in lipid droplet dynamics and lipid storage. *Nature Communications* **8**, 14858 (2017).
31. Goldstein, J. L., Basu, S. K. & Brown, M. S. Receptor-mediated endocytosis of low-density lipoprotein in cultured cells. *Meth. Enzymol.* **98**, 241–260 (1983).
32. Stephan, Z. F. & Yurachek, E. C. Rapid fluorometric assay of LDL receptor activity by DiI-labeled LDL. *J. Lipid Res.* **34**, 325–330 (1993).
33. Reynolds, G. D. & St Clair, R. W. A comparative microscopic and biochemical study of the uptake of fluorescent and 125I-labeled lipoproteins by skin fibroblasts, smooth muscle cells, and peritoneal macrophages in culture. *Am J Pathol* **121**, 200–211 (1985).
34. Romano, M. *et al.* An improved method on stimulated T-lymphocytes to functionally characterize novel and known LDLR mutations. *J Lipid Res* **52**, 2095–2100 (2011).

35. Kirshner, H., Aguet, F., Sage, D. & Unser, M. 3-D PSF fitting for fluorescence microscopy: implementation and localization application. *Journal of Microscopy* **249**, 13–25 (2013).
36. Sage, D. *et al.* DeconvolutionLab2: An open-source software for deconvolution microscopy. *Methods* **115**, 28–41 (2017).
37. Vanharanta, L. *et al.* High-content imaging and structure-based predictions reveal functional differences between Niemann-Pick C1 variants. *Traffic* **21**, 386–397 (2020).
38. Salo, V. T. *et al.* Seipin Facilitates Triglyceride Flow to Lipid Droplet and Counteracts Droplet Ripening via Endoplasmic Reticulum Contact. *Developmental Cell* **50**, 478-493.e9 (2019).
39. Carpenter, A. E. *et al.* CellProfiler: image analysis software for identifying and quantifying cell phenotypes. *Genome Biology* **7**, R100 (2006).
40. Vilhjálmsón, B. J. *et al.* Modeling Linkage Disequilibrium Increases Accuracy of Polygenic Risk Scores. *Am. J. Hum. Genet.* **97**, 576–592 (2015).

41. Hunter, J. D. Matplotlib: A 2D Graphics Environment. *Computing in Science Engineering* **9**, 90–95 (2007).
42. Michael Waskom *et al.* *mwaskom/seaborn: v0.8.1 (September 2017)*. (Zenodo, 2017).  
doi:10.5281/zenodo.883859.

1
